# Supplementary material
Source: publisher site journal article supplement (https://www.dovepress.com/article/337559)
Supplement: Supplementary file 1 [file get_supplementary_file.php]

| Sequencing primer name | Sequence | PCR Primer name | Sequence |
| --- | --- | --- | --- |
| TLR2-1F | CCCCAGCTCTCTTCTTCGAC | TLR2-1Forward | CCCCAGCTCTCTTCTTCGAC |
| TLR2-2F | AGCCAATCACAGGCAGCCAACT | TLR2-1Reverse | AAGGGGTGCAGAGAGACCAC |
| TLR2-3F | GGCTTGATTGCTCATTCCTCC | TLR2-2Forward | AGCCAATCACAGGCAGCCAACT |
| TLR2-3R | CAGGGGTCAAAGGCTCACTT | TLR2-2Reverse | AGGGTCTCCACGACCGAGCTG |
| TLR2-3F-1 | AATCAAGGCGGCCACTGAAG | TLR2-3Forward | GGCTTGATTGCTCATTCCTCC |
| TLR2-3F-2 | CCTTCACTCAGGAGCAGCAA | TLR2-3Reverse | CAGGGGTCAAAGGCTCACTT |
| TLR2-3F-3 | AGACTTTGGAAGCTGGTGGC | TLR4-1Forward | TCCTAAATTCACCAAGCCCAGG |
| TLR2-3F-4 | GGGACTTCATTCCTGGCAAGT | TLR4-1Reverse | CAAACCAGGGCACACAGTGA |
| TLR2-3F-5 | CTGGACTTCTCCCATTTCCGT | TLR4-2Forward | GGTTCCACCATGGGAATCCA |
| TLR2-3F-6 | TGTAGCAACTGGCTTAGTTCA | TLR4-2Reverse | AACACCTCACCTTGTGCAGT |
| TLR4-1F | TCCTAAATTCACCAAGCCCAGG | TLR4-3Forward | CCCAGAGCTTTCAGACTCCG |
| TLR4-2F | GGTTCCACCATGGGAATCCA | TLR4-3Reverse | AACACCTCACCTTGTGCAGT |
| TLR4-2R | AACACCTCACCTTGTGCAGT | TLR4-4Forward | AGCCTATCATTGCAGCCAGT |
| TLR4-3F | CCCAGAGCTTTCAGACTCCG | TLR4-4Reverse | ACCACACTTACATGTAGCACG |
| TLR4-4F | AGCCTATCATTGCAGCCAGT |  |  |
| TLR4-4R | ACCACACTTACATGTAGCACG |  |  |
| TLR4-4F-1 | CACAAAACTCGCTCCTATCACC |  |  |
| TLR4-4F-2 | ACACCTTCAGATAAGCAGGGC |  |  |
| TLR4-4F-3 | TAAACCCGGGGTGACCTCAT |  |  |
| TLR4-4F-4 | CCTGTACCCTTCTCACTGCC |  |  |
| TLR4-4F-5 | ACCACAGTCAGAAGTGTTTGTT |  |  |
| TLR4-4F-6 | CATCCCTGGGTGTGTTTCCA |  |  |

Supplementary Table I. The primers for TLR2/4 exon clone and sequencing.
